# Supplementary material for: Isolation and Characterisation of Major and Minor Collagens from Hyaline Cartilage of Hoki (Macruronus novaezelandiae)
Source: PubMed Central journal article supplement (PMC6521242; doi:10.3390/md17040223), 2019-04-12
Supplement: marinedrugs-17-00223-s001.pdf [file marinedrugs-17-00223-s001.pdf]

## Supplementary Materials

# Isolation and Characterization of Major and Minor Collagens from Hyaline Cartilage of Hoki (*Macruronus Novaezelandiae*)

Mathew H Cumming <sup>1\*</sup>, Bronwyn Hall <sup>1</sup> and Kathleen Hofman <sup>1</sup>

Seafood Research Unit, The New Zealand Institute for Plant and Food Research Limited, P.O. Box 5114, Port Nelson, 7043, New Zealand; Bronwyn.hall@plantandfood.co.nz (B.H.); Kathleen.Hofman@plantandfood.co.nz (K.H.)

\* Correspondence: Mathew.cumming@plantandfood.co.nz; Tel.: +64-3-989-7645

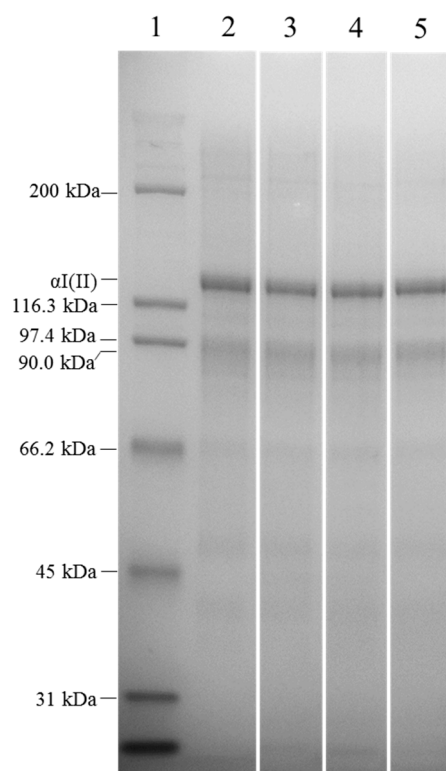

**Figure S1.** SDS-PAGE analysis of type II hoki collagen treated with 0.5% pepsin for various times. Lane 1, Broad range marker; Lane 2, 0 h; Lane 3, 3 h; Lane 4, 6 h; Lane 5, 24 h.

**Table S1.** Amino acid composition (number of residues/1000 residues) of type II collagen isolated from hoki nasal cartilage and previous studies of type II from other species and tissue.

|                 | Hoki Pepsin-Soluble Type II | Hoki Alkaline-Soluble Type II | Lamprey Notochord | Skate Fin | Sturgeon Cartilage | Bovine Cartilage | Chicken Sternum |
|-----------------|-----------------------------|-------------------------------|-------------------|-----------|--------------------|------------------|-----------------|
| <b>Asp</b>      | 50.5                        | 51.22                         | 47.0              | 41.0      | 43.9               | 48.0             | 46.0            |
| <b>Glu</b>      | 89.3                        | 91.68                         | 99.0              | 90.0      | 88.5               | 92.0             | 85.0            |
| <b>Hyp</b>      | 105.3                       | 96.83                         | 74.0              | 75.0      | 104.5              | 97.0             | 117.0           |
| <b>Ser</b>      | 46.4                        | 45.45                         | 38.0              | 30.0      | 37.3               | 28.0             | 22.0            |
| <b>Gly</b>      | 277.1                       | 288.4                         | 330.0             | 352.0     | 322.9              | 330.0            | 310.0           |
| <b>His</b>      | 4.2                         | 5.11                          | 4.0               | 2.0       | 8.1                | 2.0              | 4.0             |
| <b>Arg</b>      | 51.8                        | 50.6                          | 51.0              | 51.0      | 53.0               | 51.0             | 52.0            |
| <b>Thr</b>      | 26.6                        | 25.82                         | 27.0              | 39.0      | 21.9               | 23.0             | 26.0            |
| <b>Ala</b>      | 89.5                        | 86.12                         | 104.0             | 95.0      | 89.0               | 98.0             | 104.0           |
| <b>Pro</b>      | 123.6                       | 119.67                        | 115.0             | 113.0     | 121.6              | 115.0            | 115.0           |
| <b>Tyr</b>      | 1.6                         | 1.98                          | 2.0               | 2.0       | 2.6                | 1.0              | 5.0             |
| <b>Val</b>      | 18.5                        | 20.74                         | 12.0              | 19.0      | 15.5               | 18.0             | 19.0            |
| <b>Met</b>      | 16.5                        | 11.77                         | 0.0               | 10.0      | 3.9                | 9.0              | 10.0            |
| <b>Ile</b>      | 12.4                        | 13.68                         | 11.0              | 8.0       | 11.5               | 10.0             | 11.0            |
| <b>Leu</b>      | 41.9                        | 41.15                         | 29.0              | 27.0      | 27.7               | 26.0             | 27.0            |
| <b>Hyl</b>      | 15.3                        | 17.71                         | 22.0              | 18.0      | 18.7               | 20.0             | -               |
| <b>Phe</b>      | 14.4                        | 14.36                         | 12.0              | 12.0      | 14.6               | 14.0             | 15.0            |
| <b>Lys</b>      | 15.3                        | 17.46                         | 16.0              | 12.0      | 15.3               | 18.0             | 14.0            |
| <b>Cys</b>      | -                           | -                             | -                 | -         | -                  | -                | -               |
| <b>Citation</b> |                             |                               | [22]              | [31]      | [43]               | [30]             | [28]            |

**Table S2.** Amino acid composition (number of residues/1000 residues) of type IX collagen isolated from hoki nasal cartilage and the previous study of type IX from chicken sternum.

|                 | Hoki Pepsin-Soluble Type IX | Hoki Alkaline-Soluble Type IX | Chicken Sternum |
|-----------------|-----------------------------|-------------------------------|-----------------|
| <b>Asp</b>      | 52.6                        | 55.2                          | 53              |
| <b>Glu</b>      | 86.5                        | 106.1                         | 97              |
| <b>Hyp</b>      | 85.9                        | 89.4                          | 95              |
| <b>Ser</b>      | 46.6                        | 35.0                          | 38              |
| <b>Gly</b>      | 299.3                       | 278.2                         | 323             |
| <b>His</b>      | 7.9                         | 10.2                          | 8               |
| <b>Arg</b>      | 50.2                        | 43.6                          | 46              |
| <b>Thr</b>      | 26.4                        | 30.2                          | 16              |
| <b>Ala</b>      | 74.1                        | 57.7                          | 57              |
| <b>Pro</b>      | 124.6                       | 93.8                          | 90              |
| <b>Tyr</b>      | 1.5                         | 3.2                           | 5               |
| <b>Val</b>      | 24.8                        | 35.8                          | 23              |
| <b>Met</b>      | 13.7                        | 16.2                          | 9               |
| <b>Ile</b>      | 16.0                        | 25.5                          | 27              |
| <b>Leu</b>      | 40.4                        | 54.5                          | 48              |
| <b>Hyl</b>      | 19.5                        | 28.7                          | 34              |
| <b>Phe</b>      | 11.0                        | 12.0                          | 8               |
| <b>Lys</b>      | 17.9                        | 21.9                          | 21              |
| <b>Cys</b>      | 1.1 <sup>1</sup>            | 2.8 <sup>1</sup>              | 2               |
| <b>Citation</b> |                             |                               | [20]            |

<sup>1</sup> Measured value for cysteine is inaccurate, as it is theoretically destroyed during sample preparation.

**Table S3.** Amino acid composition (number of residues/1000 residues) of type XI collagen isolated from hoki nasal cartilage and previous studies of type XI from other species and tissue.

|                 | Hoki Alkaline-Soluble Type XI | Lamprey Notochord $\alpha$ 1(XI) | Lamprey Notochord $\alpha$ 2(XI) | Human Cartilage $\alpha$ 1(XI) | Human Cartilage $\alpha$ 2(XI) |
|-----------------|-------------------------------|----------------------------------|----------------------------------|--------------------------------|--------------------------------|
| <b>Asp</b>      | 47.3                          | 58.0                             | 52.0                             | 46.0                           | 50.0                           |
| <b>Glu</b>      | 98.1                          | 105.0                            | 100.0                            | 107.0                          | 98.0                           |
| <b>Hyp</b>      | 105.3                         | 61.0                             | 56.0                             | 98.0                           | 93.0                           |
| <b>Ser</b>      | 36.5                          | 42.0                             | 43.0                             | 25.0                           | 28.0                           |
| <b>Gly</b>      | 297.0                         | 332.0                            | 360.0                            | 334.0                          | 327.0                          |
| <b>His</b>      | 6.4                           | 8.0                              | 8.0                              | 6.0                            | 11.0                           |
| <b>Arg</b>      | 47.2                          | 42.0                             | 43.0                             | 45.0                           | 48.0                           |
| <b>Thr</b>      | 24.6                          | 24.0                             | 28.0                             | 17.0                           | 25.0                           |
| <b>Ala</b>      | 65.9                          | 69.0                             | 65.0                             | 54.0                           | 49.0                           |
| <b>Pro</b>      | 117.9                         | 106.0                            | 96.0                             | 109.0                          | 119.0                          |
| <b>Tyr</b>      | 1.5                           | 2.0                              | < 2.0                            | < 2.0                          | 3.0                            |
| <b>Val</b>      | 22.5                          | 30.0                             | 25.0                             | 28.0                           | 18.0                           |
| <b>Met</b>      | 12.1                          | -                                | -                                | 10.0                           | 9.0                            |
| <b>Ile</b>      | 14.1                          | 19.0                             | 16.0                             | 15.0                           | 16.0                           |
| <b>Leu</b>      | 46.6                          | 46.0                             | 44.0                             | 35.0                           | 39.0                           |
| <b>Hyl</b>      | 26.3                          | 31.0                             | 37.0                             | 38.0                           | 40.0                           |
| <b>Phe</b>      | 13.8                          | 8.0                              | 9.0                              | 11.0                           | 11.0                           |
| <b>Lys</b>      | 17.0                          | 21.0                             | 17.0                             | 19.0                           | 15.0                           |
| <b>Cys</b>      | -                             | -                                | -                                | -                              | -                              |
| <b>Citation</b> |                               | [22]                             | [22]                             | [33]                           | [33]                           |
